# Supplementary material
Source: PubMed Central journal article supplement (PMC5730346)
Supplement: NIHMS921938-supplement.pdf [file NIHMS921938-supplement.pdf]

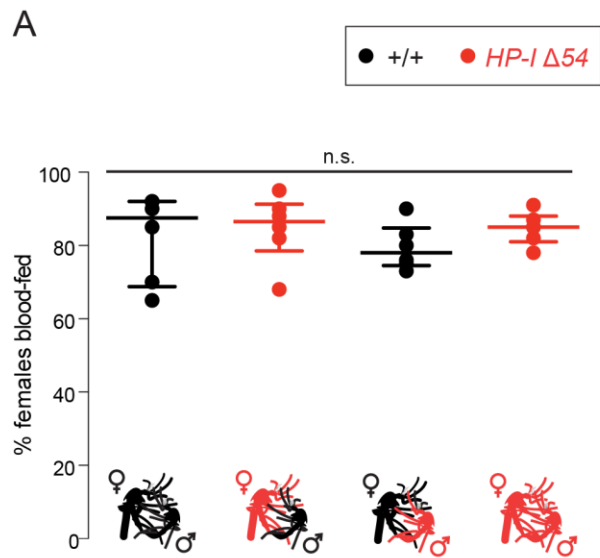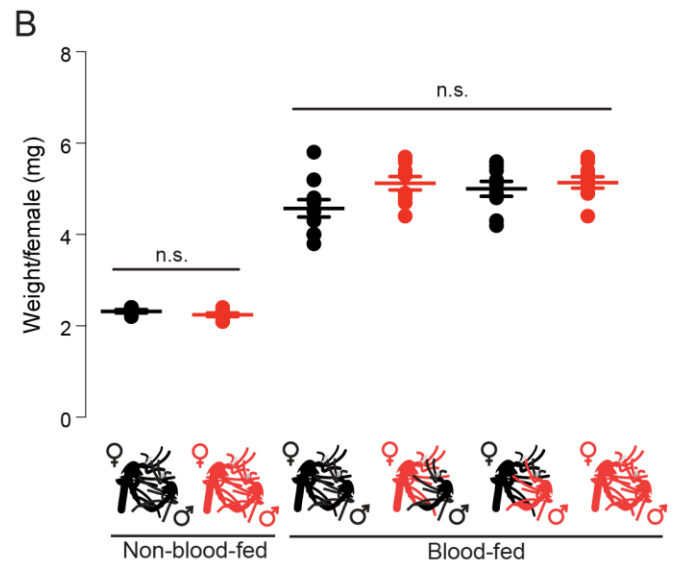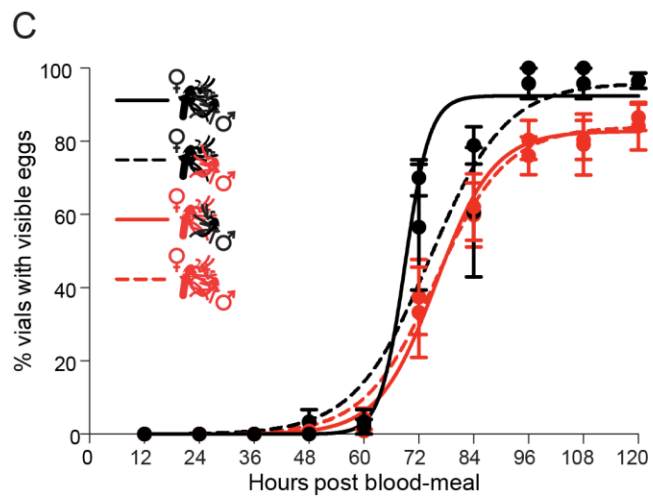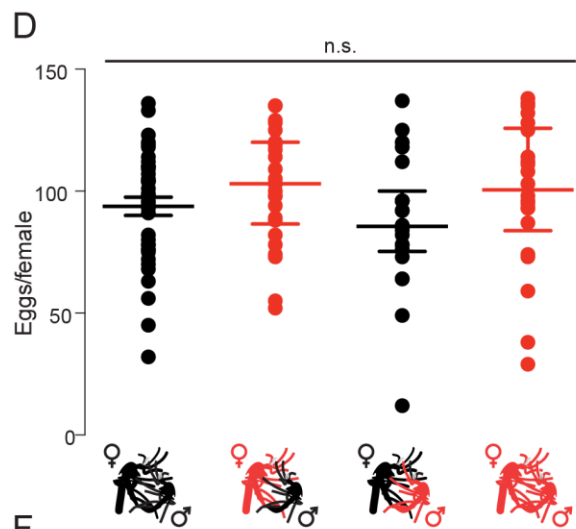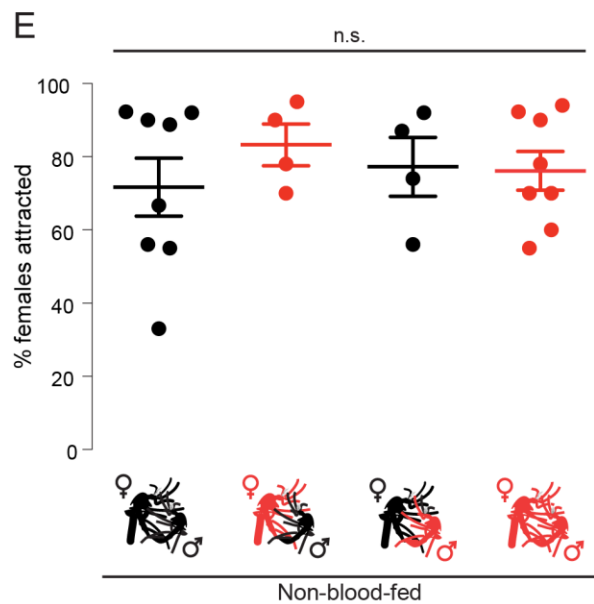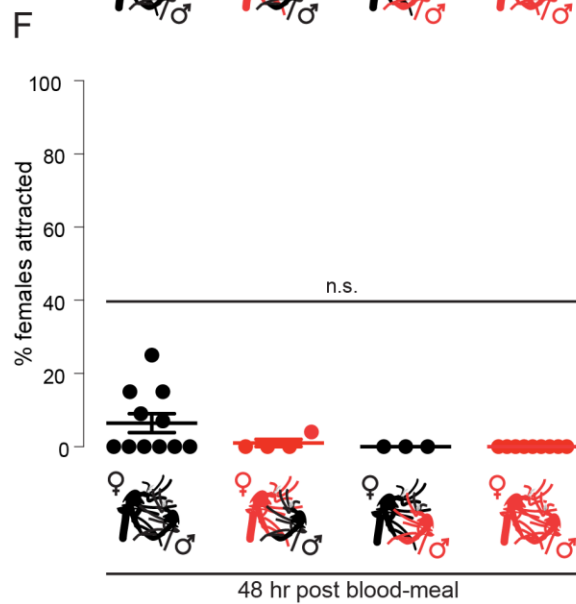

**Figure S1. Related to Figure 2. HP-I Mutant Females Show Normal Reproductive and Host-Seeking Behavior**

(A) Blood-feeding success of females of the indicated genotype who were exposed to males of the indicated genotype for >24 hours (median with interquartile range; n = 6 trials, 25 - 40 females per trial; Kruskal-Wallis test, n.s. = not significant).

(B) Weight of fully-blood-fed females in (A) immediately after blood-meal (data points represent the average weight per animal, weighed in groups of 10 females; mean  $\pm$  SEM, n=5-11 groups of 10; ANOVA followed by post-hoc Bonferroni correction for multiple comparisons, n.s. = not significant).

(C) Temporal profile of female egg-laying of the indicated genotype exposed to males of the indicated genotypes for >24 hours (mean  $\pm$  SEM; n = 5 trials, 12-24 females per trial). There was no significant difference in between the genotypes at any given time point ( $p > 0.05$  Kruskal-Wallis test).

(D) Eggs laid per individual female in (C) (mean  $\pm$  SEM; n = 22-39; ANOVA followed by Bonferroni correction for multiple comparisons, n.s. = not significant).

(E-F) Host attraction of females measured in the uniport olfactometer of the indicated genotypes, exposed to males of the indicated genotype for >24 hours, before (E) and 48 hours after (F) a blood-meal (mean  $\pm$  SEM n = 3 - 11 trials, 15 - 20 females per trial; Kruskal-Wallis test n.s. = not significant).
